# Supplementary material for: Extensive Therapeutic Drug Monitoring of Colistin in Critically Ill Patients Reveals Undetected Risks
Source: PubMed Central journal article supplement (PMC7143967; doi:10.3390/microorganisms8030415), 2020-03-15
Supplement: microorganisms-08-00415-s001.pdf [file microorganisms-08-00415-s001.pdf]

# Extensive Therapeutic Drug Monitoring Of Colistin In Critically Ill Patients Reveals Undetected Risks.

## Supplemental material 1 – elimination half times of Colistin

### Patient 1

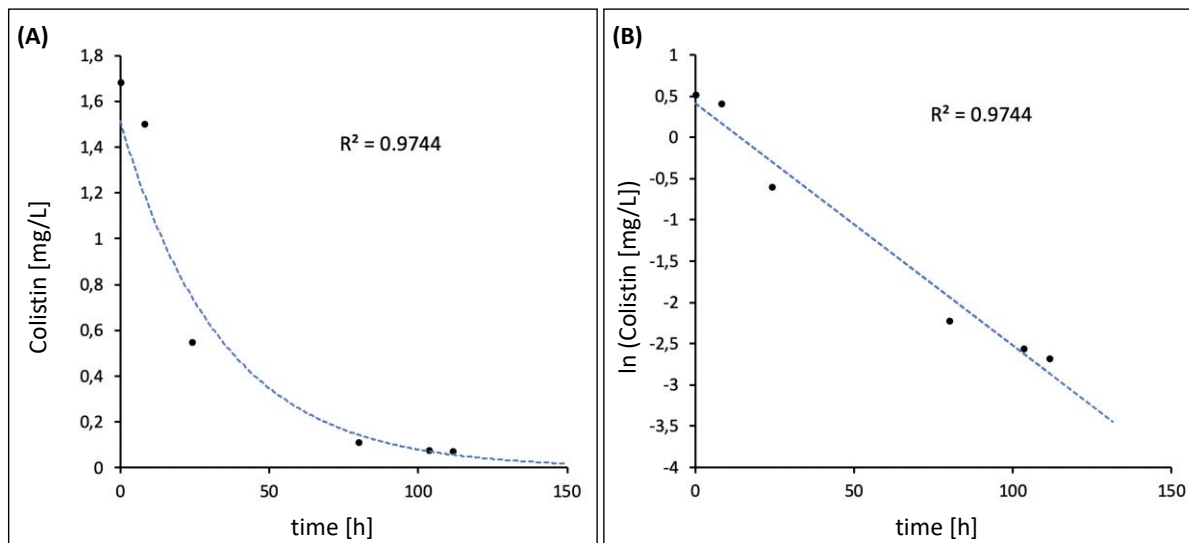

Figure S1: plasma levels of Colistin after cessation of CMS administration. (A) linear scaling of colistin plasma levels in [mg/L]; fit of an 1<sup>st</sup> decay elimination curve,  $y = 1,5111e^{-0,029x}$ ,  $R^2 = 0.97$ ,  $p < 0.001$ ; (B) linear scaling colistin plasma levels in [mg/L] after logarithmic transformation; linear fit,  $y = -0,0294x + 0,4129$ ,  $R^2 = 0.97$ ,  $p < 0.001$

Elimination half time:  $t_{1/2} = \ln(0.5)/0.0294 = 23.6$  [h]

## Patient 2

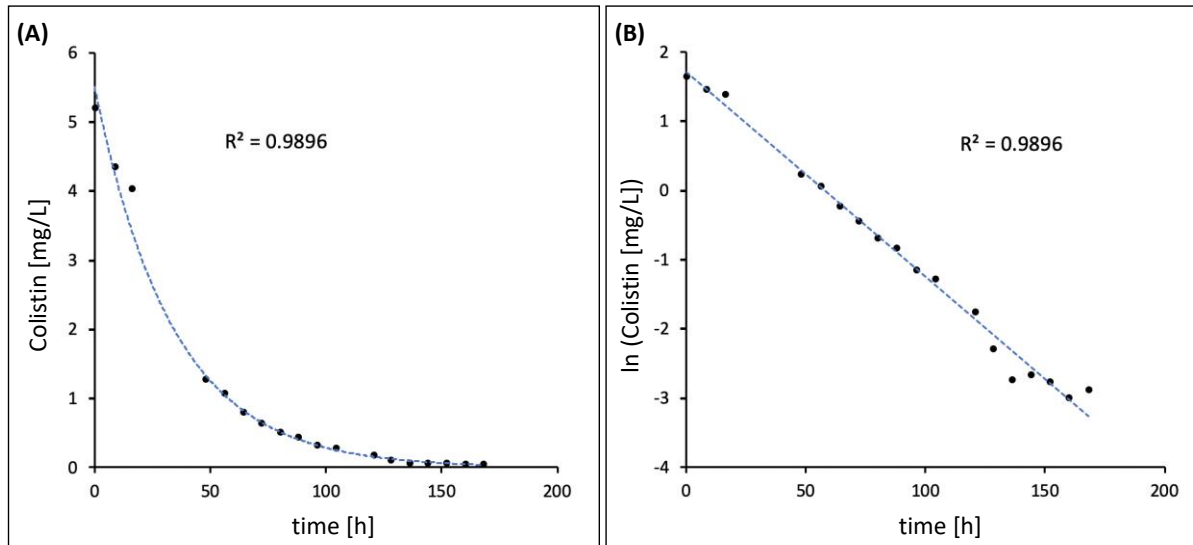

Figure S2: plasma levels of Colistin after cessation of CMS administration. (A) linear scaling of colistin plasma levels in [mg/L]; fit of an 1<sup>st</sup> decay elimination curve,  $y = 5,5021e^{-0,03x}$ ,  $R^2 = 0.99$ ,  $p < 0.001$ ; (B) linear scaling colistin plasma levels in [mg/L] after logarithmic transformation; linear fit,  $y = -0,0296x + 1,7051$ ,  $R^2 = 0.99$ ,  $p < 0.001$

Elimination half time:  $t_{1/2} = \ln(0.5)/0.0296 = 23.43$  [h]

## Patient 4

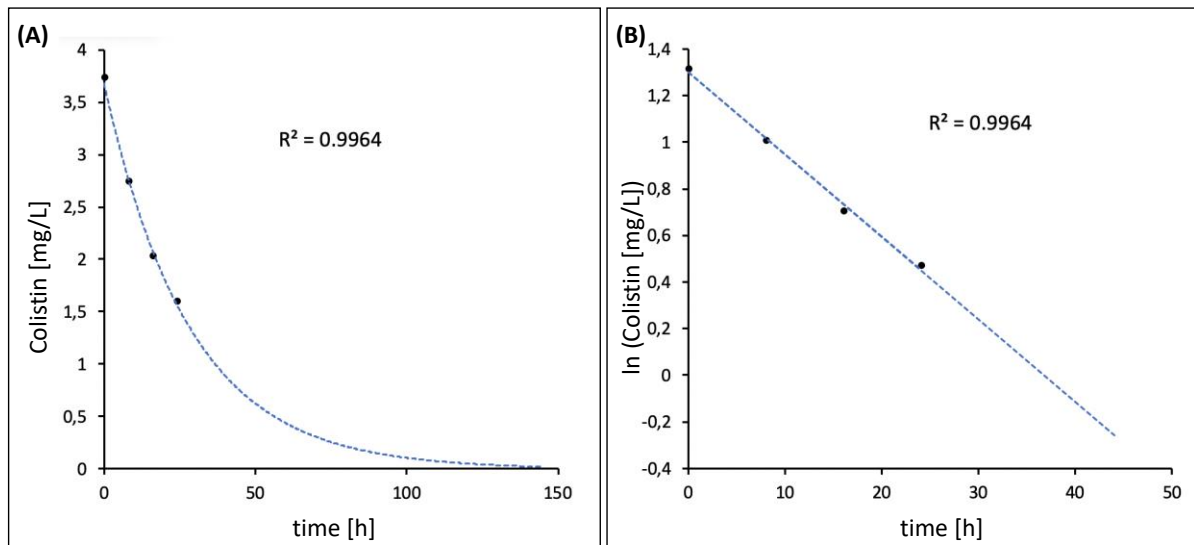

Figure S3: plasma levels of Colistin after cessation of CMS administration. (A) linear scaling of colistin plasma levels in [mg/L]; fit of an 1<sup>st</sup> decay elimination curve,  $y = 3,73e^{-0,036x}$ ,  $R^2 = 0.996$ ,  $p < 0.001$ ; (B) linear scaling colistin plasma levels in [mg/L] after logarithmic transformation; linear fit,  $y = -0,0355x + 1,3022$ ,  $R^2 = 0.996$ ,  $p < 0.001$

Elimination half time:  $t_{1/2} = \ln(0.5)/0.0355 = 19.5$  [h]

## Patient 5

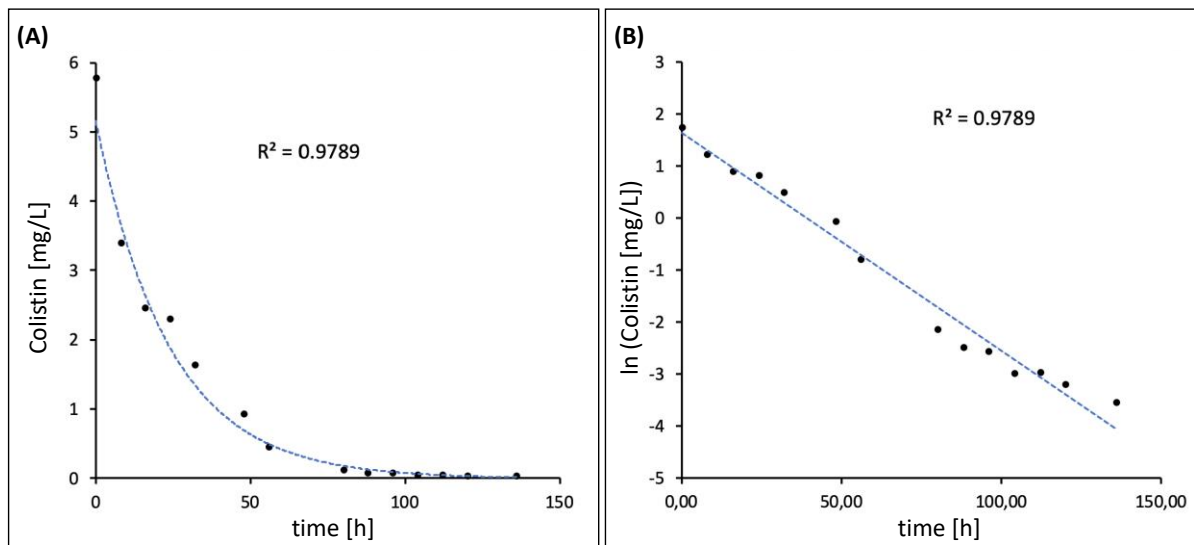

Figure S4: plasma levels of Colistin after cessation of CMS administration. (A) linear scaling of colistin plasma levels in [mg/L]; fit of an 1<sup>st</sup> decay elimination curve,  $y = 5,1619e^{-0,042x}$ ,  $R^2 = 0.98$ ,  $p < 0.001$ ; (B) linear scaling colistin plasma levels in [mg/L] after logarithmic transformation; linear fit,  $y = -0,0419x + 1,6413$ ,  $R^2 = 0.98$ ,  $p < 0.001$

Elimination half time:  $t_{1/2} = \ln(0.5)/0.0419 = 16.5$  [h]

## Patient 6

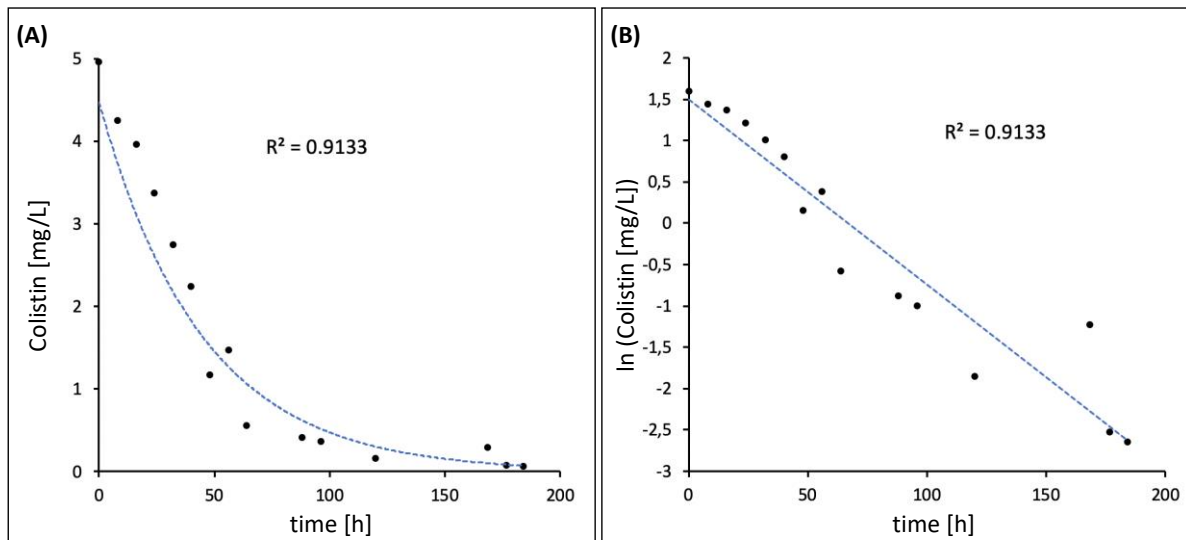

Figure S5: plasma levels of Colistin after cessation of CMS administration. (A) linear scaling of colistin plasma levels in [mg/L]; fit of an 1<sup>st</sup> decay elimination curve,  $y = 4,96e^{-0,0223x}$ ,  $R^2 = 0.91$ ,  $p < 0.001$ ; (B) linear scaling colistin plasma levels in [mg/L] after logarithmic transformation; linear fit,  $y = -0,0224x + 1,4961$ ,  $R^2 = 0.91$ ,  $p < 0.001$

Elimination half time:  $t_{1/2} = \ln(0.5)/0.0224 = 30.9$  [h]

## Patient 8

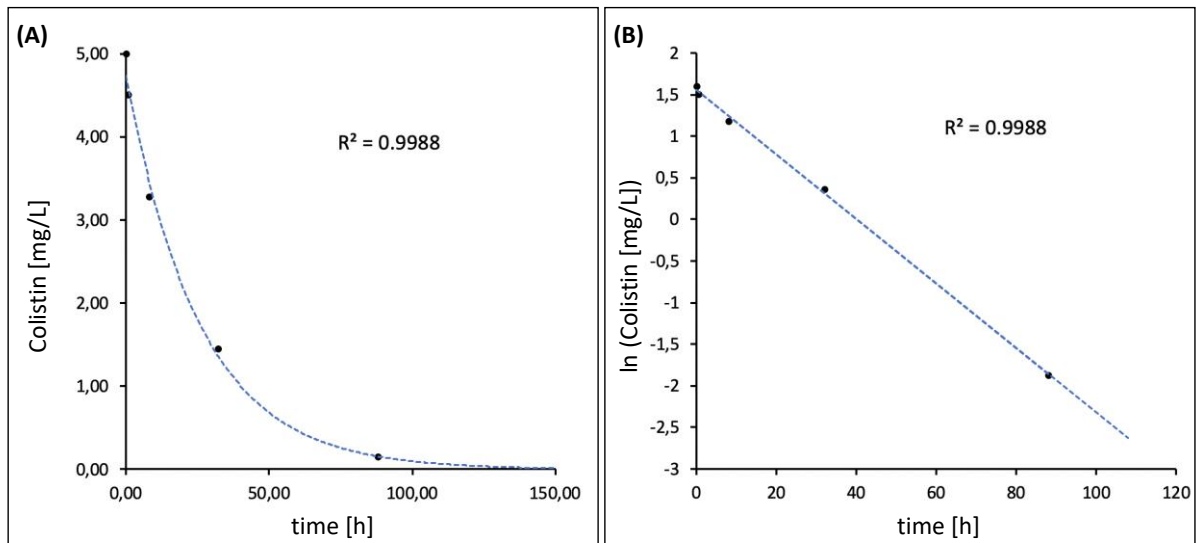

Figure S6: plasma levels of Colistin after cessation of CMS administration. (A) linear scaling of colistin plasma levels in [mg/L]; fit of an 1<sup>st</sup> decay elimination curve,  $y = 4,735e^{-0,039x}$ ,  $R^2 = 0.999$ ,  $p < 0.001$ ; (B) linear scaling colistin plasma levels in [mg/L] after logarithmic transformation; linear fit,  $y = -0,0387x + 1,555$ ,  $R^2 = 0.999$ ,  $p < 0.001$

Elimination half time:  $t_{1/2} = \ln(0.5)/0.0387 = 17.9$  [h]
